# Supplementary material for: Comparative study of the effects of laser peripheral iridotomy and cataract surgery on anterior chamber angle parameters in primary angle closure suspect patients
Source: HighWire-hosted journal article supplement (doi:10.1136/bmjophth-2023-001339), 2023-08-01
Supplement: bmjophth-2023-001339supp001_data_supplement.pdf [file bmjophth-2023-001339supp001_data_supplement.pdf]

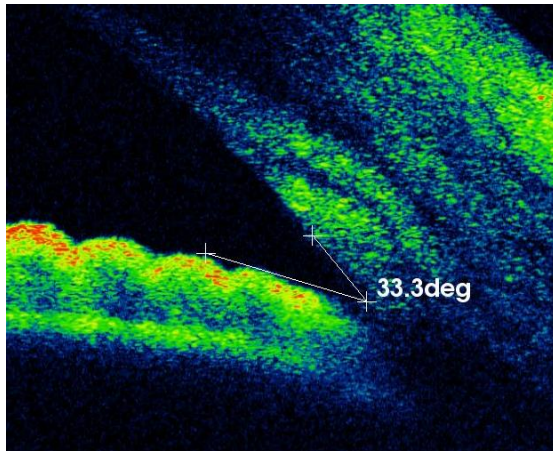

Supplementary Figure 1: Trabecular iris angle (TIA)

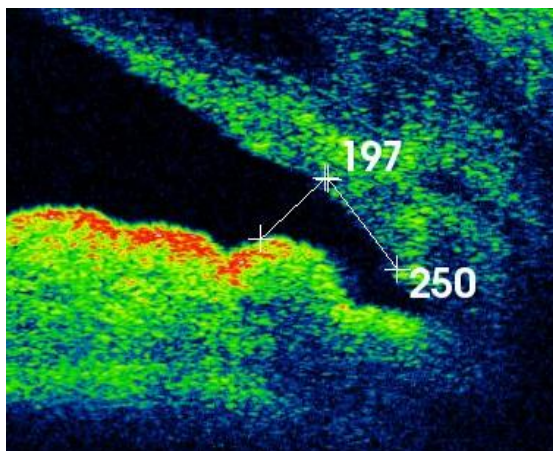

Supplementary Figure 2: Angle Opening distance at 250µm (AOD 250)

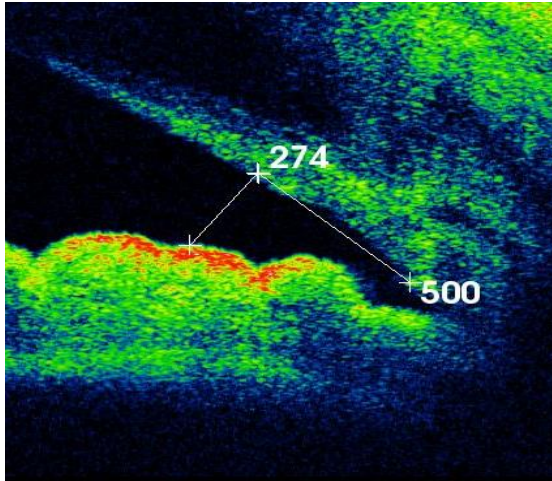

Supplementary Figure 3: Angle Opening distance at 500µm (AOD 500)

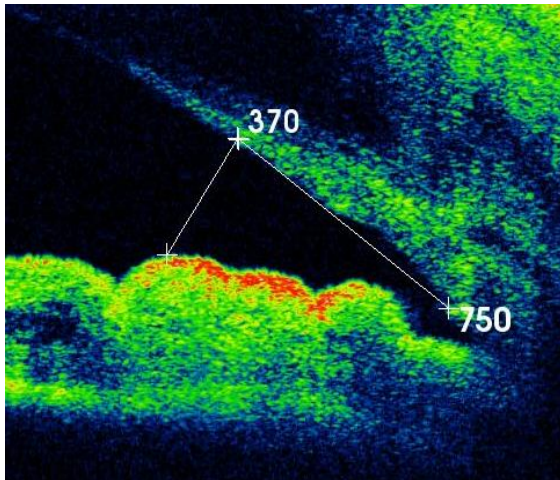

Supplementary Figure 4: Angle Opening distance at 750µm (AOD 750)

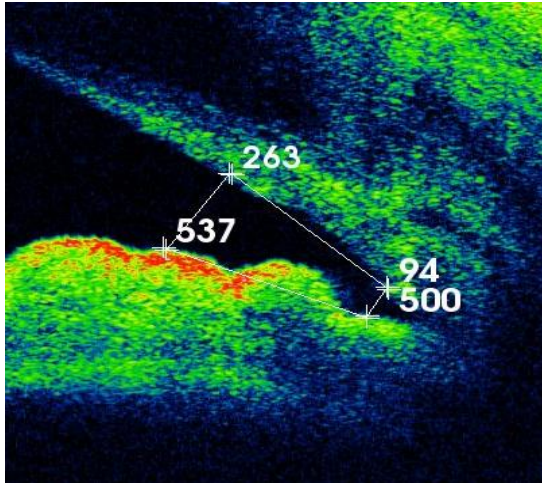

Supplementary Figure 5 Trabecular iris surface area at 500  $\mu\text{m}$  (TISA 500)

.\_\*\*

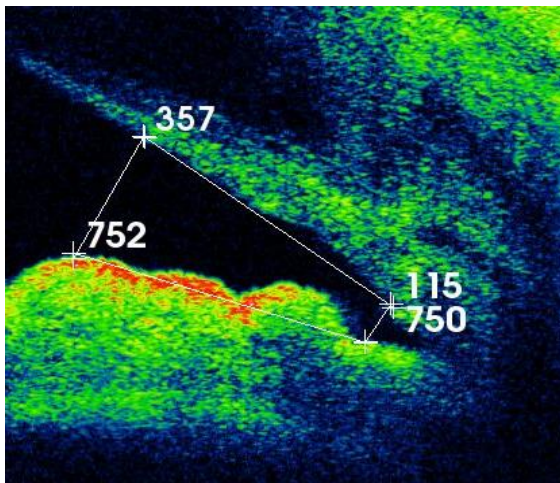

Supplementary Figure 6 Trabecular iris surface area at 750  $\mu\text{m}$  (TISA 750)

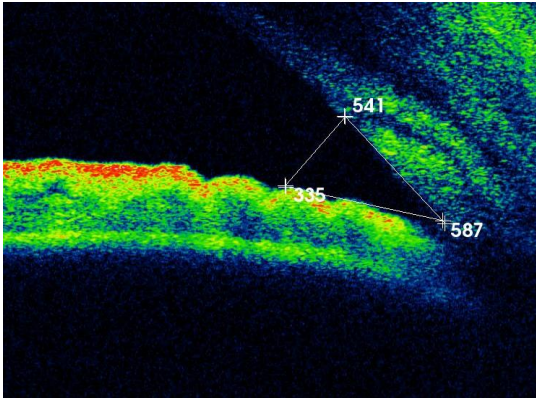

Supplementary Figure 7 Angle recess area at 500  $\mu\text{m}$  (ARA 500)
